# Supplementary material for: Progressive IgA Nephropathy Is Associated With Low Circulating Mannan-Binding Lectin–Associated Serine Protease-3 (MASP-3) and Increased Glomerular Factor H–Related Protein-5 (FHR5) Deposition
Source: PubMed Central journal article supplement (PMC5932138; doi:10.1016/j.ekir.2017.11.015), 2017-11-29
Supplement: mmc1.pdf [file mmc1.pdf]

| Characteristic                                             | All IgAN<br>(n=323)                  | Progressive IgAN<br>(n=191)                         | Stable IgAN<br>(n=83)                   | Danish Control<br>cohort (n=211) | London<br>Control cohort<br>(n=51)     |
|------------------------------------------------------------|--------------------------------------|-----------------------------------------------------|-----------------------------------------|----------------------------------|----------------------------------------|
| Male/Female                                                | 214/109                              | 127/63                                              | 51/33                                   | 110/101                          | 25/26                                  |
| Caucasian/Non-Caucasian                                    | 271/52                               | 155/36                                              | 73/10                                   | 211/0                            | 47/4                                   |
| Median age (range) – years                                 | 48 (18-84)                           | 48 (19-84)                                          | 48 (18-82)                              | 35 (26-49)                       | 31 (20-66)                             |
| Median eGFR – ml/min                                       | 52.6 (28.7-81.8)                     | 44.2 (17.7-71.3) <sup>1</sup>                       | 77.3 (47.6-106)                         | ND                               | ND                                     |
| Median urine PCR – mg/mmol                                 | 44 (16-117,<br>n=220)                | 46 (16-141.5,<br>n=125)                             | 40 (15-90, n=76)                        | ND                               | ND                                     |
| Median anti-hypertensive drug<br>classes per patient       | 1.6                                  | 1.6                                                 | 1.4                                     | ND                               | ND                                     |
| Patients with ACEi/ARB,<br>excluding dialysis patients - % | 73.7 (n=199)                         | 77.3 (n=176)                                        | 79.8 (n=83)                             | ND                               | ND                                     |
| Median systolic/diastolic blood<br>pressure – mmHg         | 134 (122-145) / 79<br>(70-88, n=294) | 136 (124 - 146) <sup>2</sup> /<br>79 (70-88, n=181) | 128 (116 - 140) /<br>77.5 (70-85, n=83) | ND                               | ND                                     |
| Median duration biopsy to<br>recruitment (months)          | 56.1 (22.8-104.7)                    | 52.2 (23.3-94.8)                                    | 68.4 (22.8-171.3)                       | ND                               | ND                                     |
| Reach ESRF - %                                             | 34.9                                 | 57.5 <sup>3</sup>                                   | 0                                       | ND                               | ND                                     |
| History of macroscopic<br>haematuria - %                   | 27.8                                 | 20.1 <sup>3</sup>                                   | 44.9                                    | ND                               | ND                                     |
| Diagnosis of Henoch-Schonlein<br>purpura - %               | 6.4                                  | 8.9 <sup>3</sup>                                    | 0                                       | ND                               | ND                                     |
| Median serum IgA – g/l                                     | 3.4 (2.9-4, n=293)                   | 3.3 (2.7-3.8,<br>n=178) <sup>4</sup>                | 3.7 (3.2-4.3, n=88)                     | ND                               | 2.8 (2.2-3.2,<br>n=57) <sup>5</sup>    |
| Median serum gd-IgA1 – AU                                  | 0.50 (0.41-0.58,<br>n=293)           | 0.52 (0.42-0.59,<br>n=178) <sup>6</sup>             | 0.47 (0.37-0.55,<br>n=88)               | ND                               | 0.42 (0.33-0.55,<br>n=57) <sup>7</sup> |

**Supplemental figure 1.** Cohort characteristics.

Values within parentheses represent interquartile range and number analysed if less than the respective cohort numbers. IgAN – IgA nephropathy; ACEi - Angiotensin-converting enzyme inhibitor; ARB - Angiotensin receptor blocker; AU – arbitrary units; ESRF – End-stage renal disease; gd-IgA1 - galactose-deficient IgA1; PCR – protein:creatinine ratio; ND – Not done. <sup>1</sup>*P* <0.0001, <sup>2</sup>*P* =0.0014, <sup>3</sup>*P* <0.0001 and <sup>4</sup>*P* =0.0007 vs. stable IgAN; <sup>5</sup>*P* <0.0001 vs. all IgAN; <sup>6</sup>*P* =0.01 vs. stable IgAN; <sup>7</sup>*P* =0.015 vs. all IgAN;
