# Supplementary material for: Progressive IgA Nephropathy Is Associated With Low Circulating Mannan-Binding Lectin–Associated Serine Protease-3 (MASP-3) and Increased Glomerular Factor H–Related Protein-5 (FHR5) Deposition
Source: PubMed Central journal article supplement (PMC5932138; doi:10.1016/j.ekir.2017.11.015), 2017-11-29
Supplement: mmc3.pdf [file mmc3.pdf]

### C3 GLOMERULOPATHY

### THIN BASEMENT MEMBRANE DISEASE

FHR1

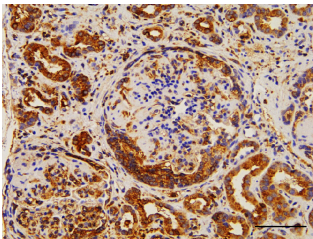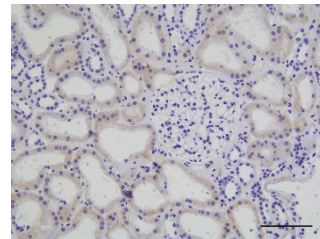

FHR5

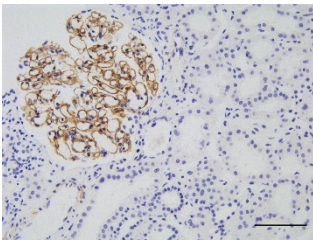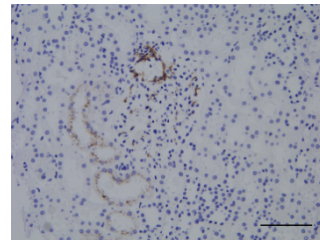

fH

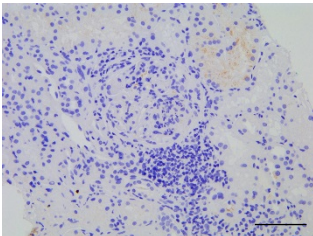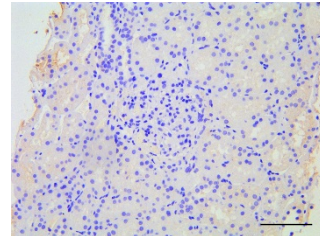

**Supplemental figure 3.** Representative images of renal immunohistochemistry staining for complement pathway antigens: FHR1, FHR5 and fH. To optimise our staining protocols we used renal tissue from patients with either C3 glomerulopathy (positive control) or thin basement membrane disease (negative control). FHR – factor H-related, fH – factor H. Bar represents 100  $\mu$ m.
