# Supplementary material for: Progressive IgA Nephropathy Is Associated With Low Circulating Mannan-Binding Lectin–Associated Serine Protease-3 (MASP-3) and Increased Glomerular Factor H–Related Protein-5 (FHR5) Deposition
Source: PubMed Central journal article supplement (PMC5932138; doi:10.1016/j.ekir.2017.11.015), 2017-11-29
Supplement: mmc4.pdf [file mmc4.pdf]

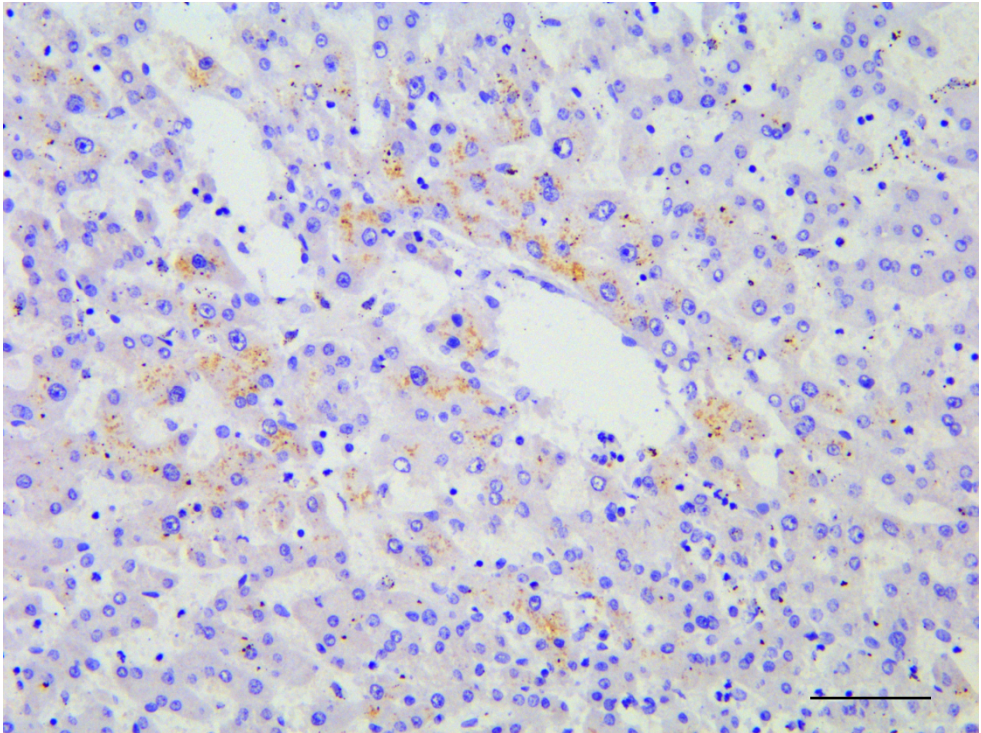

**Supplemental figure 4.** Representative images of liver immunohistochemistry staining for fH. To optimise our staining protocol for fH we utilised human liver tissue. The tissue was resected for possible metastatic disease and an area of unaffected tissue was used for staining. Staining for fH was evident in hepatocytes. fH – factor H. Bar represents 100  $\mu\text{m}$ .
