# Supplementary material for: Progressive IgA Nephropathy Is Associated With Low Circulating Mannan-Binding Lectin–Associated Serine Protease-3 (MASP-3) and Increased Glomerular Factor H–Related Protein-5 (FHR5) Deposition
Source: PubMed Central journal article supplement (PMC5932138; doi:10.1016/j.ekir.2017.11.015), 2017-11-29
Supplement: mmc5.pdf [file mmc5.pdf]

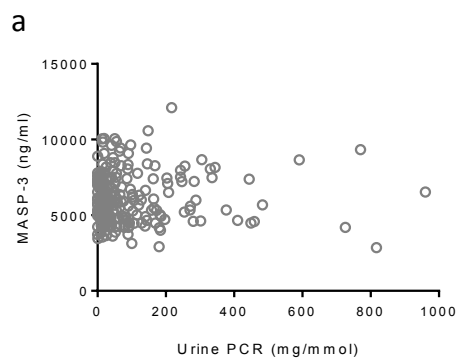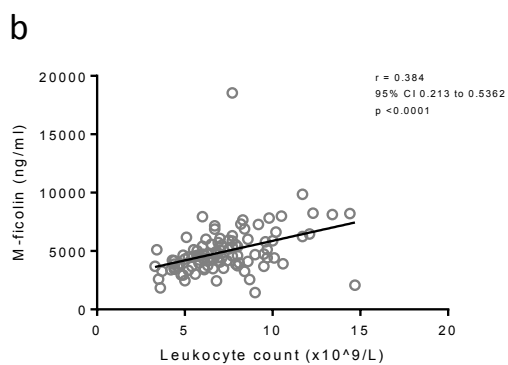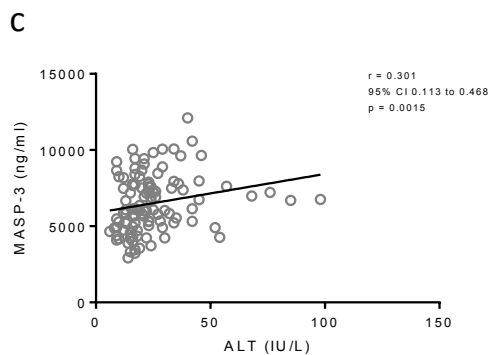

**Supplemental figure 5.** (a) Correlation of plasma MASP-3 levels and urine protein-creatinine ratio (PCR) in patients ( $n=223$ ) with IgA nephropathy. (b) Correlation of plasma M-ficolin with white cell count (WCC) in patients ( $n=108$ ) with IgA nephropathy. (c) Correlation between MBL-associated serine protease (MASP)-3 with alanine aminotransferase (ALT) in patients ( $n=108$ ) with IgA nephropathy.  $P$  values derived from Spearman's rank correlation. CI – confidence interval.
