# Supplementary material for: Progressive IgA Nephropathy Is Associated With Low Circulating Mannan-Binding Lectin–Associated Serine Protease-3 (MASP-3) and Increased Glomerular Factor H–Related Protein-5 (FHR5) Deposition
Source: PubMed Central journal article supplement (PMC5932138; doi:10.1016/j.ekir.2017.11.015), 2017-11-29
Supplement: mmc7.pdf [file mmc7.pdf]

| Lectin pathway protein | Progressive disease (n=191) | Stable disease (n=83) | Difference between medians | 95% Confidence Interval |
|------------------------|-----------------------------|-----------------------|----------------------------|-------------------------|
| M-ficolin, ng/ml       | 5375<br>(1096-18538)        | 5335<br>(2954-11529)  | 40                         | -441 to 446             |
| L-ficolin, ng/ml       | 3245<br>(872-9230)          | 3763<br>(1487-8500)   | -518                       | -758 to 36              |
| MASP-1, ng/ml          | 10013<br>(2439-24591)       | 10628<br>(3065-56002) | -615                       | -1660 to 184            |
| MAp19, ng/ml           | 555<br>(242-996)            | 564<br>(305-818)      | -9                         | -32 to 39               |

**Supplemental figure 7.** Lectin pathway protein levels in stable and progressive IgA nephropathy  
 Values represent median with range of values in parentheses; MBL - mannan-binding lectin; MASP –  
 MBL-associated serine protease; MAp, - MBL-associated protein.
